# Supplementary material for: Endometriosis Patients in the Postmenopausal Period: Pre- and Postmenopausal Factors Influencing Postmenopausal Health
Source: Hindawi journal article supplement (doi:10.1155/2014/746705), 2014-01-01
Supplement: f1 [file 746705.f1.pdf]

## SUPPLEMENTAL DIGITAL CONTENT 1:

Correlation coefficients for the three target variables in the postmenopausal period.

|                                | Postmenopausal |             |                    |
|--------------------------------|----------------|-------------|--------------------|
|                                | Pain intensity | Dyspareunia | Sexual dysfunction |
| <b>General</b>                 |                |             |                    |
| Pain intensity <i>post</i>     |                | 0.540**     | 0.465**            |
| Dyspareunia <i>post</i>        | 0.540**        |             | 0.875**            |
| Sexual dysfunction <i>post</i> | 0.465**        | 0.875**     |                    |
| Age                            | −0.133         | −0.194      | −0.167             |
| Retired (yes/no)               | 0.200          | −0.041      | −0.058             |
| Hospital stays                 | 0.371*         | 0.353*      | 0.372*             |
| Hypertension                   | 0.177          | −0.030      | −0.003             |
| Malignancies                   | 0.000          | −0.245      | −0.244             |
| Diabetes                       | 0.176          | −0.084      | −0.071             |
| Current smoker                 | 0.236          | 0.151       | 0.079              |
| Former smoker                  | −0.356*        | −0.105      | −0.206             |
| More than 10 cigarettes        | −0.235         | −0.167      | −0.256             |
| No. of cigarettes              | −0.166         | −0.116      | −0.277             |
| Cigarettes — packs/year        | −0.195         | −0.150      | −0.291             |
| Allergies                      | 0.386*         | 0.171       | 0.210              |
| Postmenopausal since when      | 0.218          | −0.049      | −0.176             |
| Gravidity                      | −0.130         | 0.008       | −0.214             |
| Parity                         | −0.111         | 0.158       | −0.057             |
| Miscarriage(s)                 | −0.195         | −0.324      | −0.493**           |
| <b>Family history</b>          |                |             |                    |
| Mother with painful periods    | 0.087          | 0.154       | 0.119              |
| Mother had endometriosis       | 0.042          | 0.091       | −0.069             |
| Sister with painful periods    | −0.004         | 0.071       | 0.071              |
| Sister had endometriosis       | 0.250          | −0.030      | 0.068              |
| Daughter with painful periods  | −0.149         | 0.028       | −0.028             |

|                                                         | Postmenopausal |             |                    |
|---------------------------------------------------------|----------------|-------------|--------------------|
|                                                         | Pain intensity | Dyspareunia | Sexual dysfunction |
| Daughter had endometriosis                              | −0.031         | −0.304      | −0.303             |
| <b>Premenopausal symptoms</b>                           |                |             |                    |
| General condition                                       | 0.483**        | 0.248       | 0.244              |
| Pain since first period (yes/no)                        | −0.125         | −0.112      | 0.037              |
| Pain intensity since first period                       | −0.165         | −0.003      | 0.089              |
| Pain (yes/no)                                           | 0.276          | 0.135       | 0.244              |
| Pain intensity                                          | −0.022         | 0.228       | 0.226              |
| Pain during sexual intercourse                          | 0.284          | 0.354*      | 0.287              |
| Pain intensity during sexual intercourse                | 0.370*         | 0.385*      | 0.287              |
| Rarely with pain during sexual intercourse              | 0.157          | 0.216       | 0.128              |
| Always with pain during sexual intercourse              | 0.042          | 0.274       | 0.224              |
| Pain during sexual intercourse only at ovulation        | −0.018         | 0.049       | 0.048              |
| Pain during sexual intercourse only before/after menses | 0.143          | −0.079      | −0.123             |
| Sexuality affected by endometriosis                     | 0.385*         | 0.625**     | 0.607**            |
| Intestinal cramp                                        | 0.160          | 0.217       | 0.243              |
| Dyschezia                                               | 0.108          | 0.048       | −0.012             |
| Diarrhea                                                | 0.056          | −0.029      | 0.083              |
| Constipation                                            | −0.217         | −0.092      | −0.213             |
| Mucus in feces                                          | 0.228          | 0.039       | 0.090              |
| Blood in feces                                          | 0.319          | 0.235       | 0.234              |
| Dysuria                                                 | 0.238          | 0.261       | 0.132              |
| Blood in urine                                          | 0.151          | 0.075       | 0.138              |
| Urinary stasis                                          | −0.019         | 0.028       | 0.103              |
| Increased urinary urgency                               | 0.262          | 0.275       | 0.214              |
| Incontinence                                            | 0.114          | 0.198       | 0.031              |
| Retrosymphyseal pain                                    | 0.029          | 0.248       | 0.132              |
| With strenuous activities                               | 0.460**        | 0.359*      | 0.300              |
| With moderately strenuous                               | 0.516**        | 0.410*      | 0.287              |

|                                             | Postmenopausal |             |                    |
|---------------------------------------------|----------------|-------------|--------------------|
|                                             | Pain intensity | Dyspareunia | Sexual dysfunction |
| activities                                  |                |             |                    |
| Carrying shopping bag                       | 0.461**        | 0.366*      | 0.341*             |
| Climbing steps                              | 0.453**        | 0.564**     | 0.362*             |
| Climbing one step                           | 0.353*         | 0.359*      | 0.306              |
| Walking > 1 km                              | 0.548**        | 0.496**     | 0.385*             |
| Restrictions when bending/kneeling/stooping | 0.643**        | 0.588**     | 0.401*             |
| Restrictions when bathing/dressing          | 0.256          | 0.260       | 0.089              |
| Physical restrictions                       | 0.500**        | 0.427*      | 0.336*             |
| Psychological problems                      | 0.530**        | 0.514**     | 0.453**            |
| Impairment of social contacts               | 0.500**        | 0.507**     | 0.506**            |
| Impairment of everyday living/work          | 0.182          | 0.433**     | 0.496**            |
| <b>Postmenopausal symptoms</b>              |                |             |                    |
| General condition                           | 0.641**        | 0.365*      | 0.403*             |
| Pain (yes/no)                               | 0.862**        | 0.430**     | 0.361*             |
| Pain due to endometriosis                   | 0.616**        | 0.554**     | 0.484**            |
| Pain with other causes                      | 0.080          | -0.314      | -0.235             |
| Pain during sexual intercourse              | 0.468**        | 0.912**     | 0.730**            |
| Intestinal cramp                            | 0.467**        | 0.174       | 0.250              |
| Dyschezia                                   | 0.313          | 0.253       | 0.304              |
| Diarrhea                                    | 0.070          | -0.116      | -0.205             |
| Constipation                                | 0.200          | 0.056       | 0.125              |
| Mucus in feces                              | 0.216          | -0.059      | 0.067              |
| Blood in feces                              | 0.255          | 0.197       | 0.303              |
| Dysuria                                     | 0.409*         | 0.443**     | 0.482**            |
| Urinary stasis                              | -0.192         | -0.170      | -0.170             |
| Increased urinary urgency                   | 0.396*         | 0.438**     | 0.367*             |
| Incontinence                                | 0.195          | 0.395*      | 0.421*             |
| Retrosymphyseal pain                        | 0.579**        | 0.623**     | 0.547**            |
| Association with bladder symptoms           | 0.393*         | 0.633**     | 0.590**            |
| With strenuous activities                   | 0.553**        | 0.499**     | 0.402*             |
| With moderately strenuous                   | 0.596**        | 0.512**     | 0.501**            |

|                                                   | Postmenopausal |             |                    |
|---------------------------------------------------|----------------|-------------|--------------------|
|                                                   | Pain intensity | Dyspareunia | Sexual dysfunction |
| activities                                        |                |             |                    |
| Carrying shopping bag                             | 0.553**        | 0.396*      | 0.467**            |
| Climbing steps                                    | 0.606**        | 0.389*      | 0.170              |
| Climbing one step                                 | 0.516**        | 0.376*      | 0.293              |
| Restrictions when bending/kneeling/stooping       | 0.658**        | 0.643**     | 0.456**            |
| Walking > 1 km                                    | 0.644**        | 0.441**     | 0.349*             |
| Restrictions when bathing/dressing                | 0.406*         | 0.092       | 0.031              |
| Physical restrictions                             | 0.676**        | 0.691**     | 0.605**            |
| Physical restrictions of other cause              | 0.228          | -0.059      | -0.174             |
| Psychological problems                            | 0.471**        | 0.435**     | 0.407*             |
| Psychological problems of other cause             | 0.030          | -0.267      | -0.307             |
| Impairment of social contacts                     | 0.164          | 0.264       | 0.293              |
| Impairment of social contacts of other cause      | -0.129         | -0.238      | -0.247             |
| Impairment of everyday living/work                | 0.706**        | 0.459**     | 0.548**            |
| Impairment of everyday living/work of other cause | 0.280          | -0.243      | -0.194             |
| <b>Premenopausal medication</b>                   |                |             |                    |
| Premenopausal medication (yes/no)                 | 0.175          | 0.287       | 0.180              |
| GnRH analogues                                    | 0.010          | 0.129       | -0.112             |
| Oral contraception                                | 0.126          | 0.229       | 0.169              |
| Period of medication                              | 0.182          | 0.253       | 0.143              |
| Success of medication                             | 0.144          | 0.192       | 0.066              |
| Side effects of medication                        | 0.090          | 0.281       | 0.157              |
| <b>Postmenopausal medication</b>                  |                |             |                    |
| Hormone replacement therapy                       | 0.343*         | 0.485**     | 0.480**            |
| Period of medication                              | 0.276          | 0.463**     | 0.449**            |
| Side effects of medication                        | 0.348*         | 0.338*      | 0.337*             |
| Alternative medicine treatments                   | 0.059          | 0.228       | 0.348*             |

|                                                | Postmenopausal |             |                    |
|------------------------------------------------|----------------|-------------|--------------------|
|                                                | Pain intensity | Dyspareunia | Sexual dysfunction |
| <b>Surgical treatment</b>                      |                |             |                    |
| Gynecological operations, total                | 0.168          | 0.142       | 0.070              |
| Gynecological operations with endometriosis    | 0.213          | 0.221       | 0.120              |
| Gynecological operations without endometriosis | 0.013          | −0.074      | 0.038              |
| Laparoscopy                                    | 0.061          | 0.188       | 0.097              |
| Laparotomy                                     | 0.215          | 0.128       | 0.089              |
| Hysteroscopy                                   | 0.075          | −0.245      | 0.013              |
| Curettage                                      | −0.118         | −0.246      | −0.267             |
| Hysterectomy                                   | 0.320          | 0.150       | 0.201              |
| Hysterectomy without adnexa                    | −0.335*        | −0.284      | −0.271             |
| Hysterectomy with unilateral adnexa            | 0.278          | −0.020      | 0.024              |
| Hysterectomy with bilateral adnexa             | 0.412*         | 0.447**     | 0.445**            |
| Time point of adnexectomy                      | 0.229          | 0.299       | 0.303              |
| Unilateral adnexectomy                         | 0.278          | −0.020      | 0.024              |
| Bilateral adnexectomy                          | 0.258          | 0.425*      | 0.424*             |

\*  $P < 0.05$

\*\*  $P < 0.01$

## **SUPPLEMENTAL DIGITAL CONTENT 2:**

The following questionnaire items were used as independent variables for all multiple regression analyses:

- Difficulty when bending, kneeling or stooping (yes/no)
- Hysterectomy with bilateral adnexectomy (yes/no)
- Retrosymphyseal pain (yes/no)
- Blood in urine (yes/no)
- Pain during sexual intercourse (0–10)
- General pain due to endometriosis (0–10)
- Physical impairment due to endometriosis (yes/no)
- Drug intake for treatment of endometriosis or its symptoms (yes/no)
- Effects on sexual life due to endometriosis (0–10)
- Difficulty when climbing stairs (yes/no)
- Pain during defecation (yes/no)
- Side effects of drug intake (yes/no)
- Hysterectomy not including adnexa (yes/no)
- Impairment of everyday life or working life due to endometriosis (yes/no)
- Period of drug intake to treat endometriosis or its symptoms (months)
- Hysterectomy (yes/no)
- Hysterectomy with unilateral adnexectomy (yes/no)
- Urinary stasis (yes/no)
- Mother had painful menstruations (yes/no)
- Impaired social contacts (yes/no)

All of the above independent variables were related only to the premenopausal, active period of endometriosis.

Best regression model for predicting an effect on general postmenopausal pain due to premenopausal factors

|                                                     | Regression coefficient B | P value | 95% confidence intervals for B |                 |
|-----------------------------------------------------|--------------------------|---------|--------------------------------|-----------------|
|                                                     |                          |         | Lower threshold                | Upper threshold |
| (Intercept)                                         | 0.350                    | 0.666   | −1.296                         | 1.997           |
| Physical restriction when bending/kneeling/stooping | 3.374                    | < 0.001 | 1.785                          | 4.963           |
| Hysterectomy with bilateral adnexectomy             | 3.549                    | < 0.001 | 2.235                          | 4.863           |
| Retrosymphyseal pain                                | −5.260                   | < 0.001 | −6.921                         | −3.599          |
| Hematuria                                           | 2.621                    | 0.003   | 0.985                          | 4.256           |
| Pain during sexual intercourse INT                  | 0.489                    | 0.001   | 0.231                          | 0.747           |
| General pain INT                                    | −0.331                   | 0.006   | −0.557                         | −0.105          |
| Physical restriction                                | 1.739                    | 0.022   | 0.277                          | 3.201           |
| Hormone therapy                                     | 1.181                    | 0.048   | 0.014                          | 2.349           |

Model summary:  $R^2 = 0.833$ ;  $P < 0.001$ .

Positive regression coefficient: increase in postmenopausal pain.

Negative regression coefficient: reduction in postmenopausal pain.

Best regression model for predicting an effect on postmenopausal pain during sexual intercourse due to premenopausal factors

|                                          | Regression coefficient B | P value | 95% confidence intervals for B |                 |
|------------------------------------------|--------------------------|---------|--------------------------------|-----------------|
|                                          |                          |         | Lower threshold                | Upper threshold |
| (Intercept)                              | −2.194                   | 0.001   | −3.346                         | −1.042          |
| Effect on sexual life                    | 0.201                    | 0.030   | 0.022                          | 0.380           |
| Hysterectomy with bilateral adnexectomy  | 3.533                    | < 0.001 | 2.481                          | 4.584           |
| Physical restriction when climbing steps | 2.279                    | < 0.001 | 1.288                          | 3.269           |
| Dyschezia                                | −2.504                   | < 0.001 | −3.592                         | −1.415          |
| Drug side effects                        | 1.979                    | 0.001   | 0.847                          | 3.111           |
| Hysterectomy without adnexectomy         | 3.217                    | < 0.001 | 1.673                          | 4.761           |
| Impairment of everyday living and work   | 2.109                    | 0.006   | 0.656                          | 3.562           |
| Medication (months)                      | −0.007                   | 0.025   | −0.012                         | −0.001          |

Model summary:  $R^2 = 0.857$ ;  $P < 0.001$ .

Positive regression coefficient: increase in postmenopausal pain.

Negative regression coefficient: reduction in postmenopausal pain.

Best regression model for predicting impairment of postmenopausal sexuality  
due to premenopausal factors

|                                             | Regression<br>coefficient<br>B | P value | 95% confidence<br>intervals for B |                    |
|---------------------------------------------|--------------------------------|---------|-----------------------------------|--------------------|
|                                             |                                |         | Lower<br>threshold                | Upper<br>threshold |
| (Intercept)                                 | −4.163                         | < 0.001 | −5.447                            | −2.880             |
| Effect on sexual life                       | 0.512                          | < 0.001 | 0.329                             | 0.694              |
| Dyschezia                                   | −3.034                         | < 0.001 | −4.224                            | −1.843             |
| Hysterectomy                                | 4.631                          | < 0.001 | 3.629                             | 5.632              |
| Hysterectomy with unilateral<br>adnexectomy | −5.925                         | < 0.001 | −7.629                            | −4.222             |
| Impairment of everyday living and work      | 4.351                          | < 0.001 | 2.495                             | 6.207              |
| Urinary stasis                              | 3.344                          | < 0.001 | 1.996                             | 4.692              |
| Medication (months)                         | −0.012                         | < 0.001 | −0.018                            | −0.006             |
| Drug side effects                           | 1.773                          | 0.007   | 0.532                             | 3.013              |
| Physical restrictions when climbing steps   | 2.986                          | < 0.001 | 1.726                             | 4.247              |
| Retrosymphyseal pain                        | −3.467                         | < 0.001 | −5.144                            | −1.789             |
| Dysmenorrhea in mother                      | 2.290                          | 0.004   | 0.833                             | 3.747              |
| Impairment of social contacts               | −1.908                         | 0.037   | −3.693                            | −0.124             |

Model summary:  $R^2 = 0.931$ ;  $P < 0.001$ .

Positive regression coefficient: increase in postmenopausal sexual impairment.

Negative regression coefficient: reduction in postmenopausal sexual impairment.
